# Supplementary material
Source: publisher figshare collection journal article supplement (https://wiley.figshare.com/articles/dataset/_/3561999)
Supplement: Supplementary file 1 [file 1]

## **Appendix B – Stochastic partial differential equation approximation to Gaussian random fields**

As a maximum likelihood implementation of the spatial Gompertz model, we use a stochastic partial differential equation (SPDE) approximation to a Gaussian random field (Lindgren et al. 2011), as previously implemented and tested in the integrated nested Laplace approximation (INLA) software (Rue et al. 2009). This approach approximates a Gaussian random field using a Gaussian Markov random field whose pairwise correlations follow the Matérn class. This approximation yields the following equivalence:

$$\mathbf{Q} = \tau^2(\kappa^4 \mathbf{C} + 2\kappa^2 \mathbf{G}_1 + \mathbf{G}_2) \tag{B.1}$$

where  $\mathbf{Q}$  is the precision matrix of Gaussian Markov random field approximation,  $\kappa$  and  $\tau$  are parameters in the Matérn approximation (when specifying Matérn smoothness parameter  $\nu=1$ ), and  $\mathbf{C}$ ,  $\mathbf{G}_1$ , and  $\mathbf{G}_2$  are sparse matrices representing a piecewise linear basis function for the approximation (see Lindgren et al. 2010, Lindgren and Rue 2013 for details).  $\mathbf{C}$ ,  $\mathbf{G}_1$ , and  $\mathbf{G}_2$  are calculated using the R-INLA software (Lindgren and Rue 2013) in two steps. First, nodes for a finite element analysis “mesh” are calculated using R-INLA, where this mesh defines a piecewise linear (i.e., triangular in 2-dimensional space) approximation to  $\mathbf{C}$ ,  $\mathbf{G}_1$ , and  $\mathbf{G}_2$  between nodes. This mesh has  $K$  nodes, where nodes are included at each of  $I$  stations as well as additional locations, and the number of additional locations can be predefined to control the tradeoff between precision and computational complexity of the SPDE approximation. R-INLA then calculates values for  $\mathbf{C}$ ,  $\mathbf{G}_1$ , and  $\mathbf{G}_2$  at each node. These three sparse matrices are then extracted from R-INLA, and used in Template Model Builder (TMB, Kristensen et al. 2013) in subsequent steps of the maximum likelihood estimation.

Maximum likelihood estimation proceeds by defining  $\mathbf{\Omega}^{(k)}$  and  $\mathbf{\Psi}_t^{(k)}$ , i.e., random fields defined at each node in the SPDE approximation. These follow a multivariate normal distribution.

$$\begin{aligned}\mathbf{\Omega} &\sim MVN(\alpha\mathbf{1}, \Sigma_{\Omega}) \\ \mathbf{\Psi} &\sim MVN(0, \Sigma_E \otimes \Sigma_{\psi})\end{aligned}\tag{B.2}$$

where:

$$\begin{aligned}\Sigma_{\Omega} &= \left(\tau_{\Omega}^2(\kappa_{\Omega}^4\mathbf{C} + 2\kappa_{\Omega}^2\mathbf{G}_1 + \mathbf{G}_2)\right)^{-1} \\ \Sigma_E &= \left(\tau_E^2(\kappa_E^4\mathbf{C} + 2\kappa_E^2\mathbf{G}_1 + \mathbf{G}_2)\right)^{-1}\end{aligned}\tag{B.3}$$

and  $\Sigma_{\psi}$  is as defined in Eq. 2c (in the present application, we assume that  $\kappa_{\Omega} = \kappa_E$ , although future applications could explore the consequences of relaxing this assumption).  $\mathbf{\Omega}^{(k)}$  and  $\mathbf{\Psi}_t^{(k)}$  at knots that correspond to stations with data are then used to calculate the conditional probability of available data.

The computational cost of this SPDE approximation is  $O(n^{3/2})$ , while the cost of inverting the original Gaussian random field is  $O(n^3)$ , so this approximation is expected to gain in importance as the number of stations for available data increases. Following an empirical hierarchical modelling strategy (*sensu* Cressie and Wikle 2011),  $\mathbf{\Omega}^{(k)}$  and  $\mathbf{\Psi}_t^{(k)}$  are integrated across while calculating the marginal likelihood of  $\kappa$ ,  $\tau_{\Omega}$ ,  $\tau_E$ ,  $\alpha$ , and any other hyperparameters of interest. We then use the delta-method to back-calculate the value of interpretable parameters, i.e., the distance at which the correlation has fallen to approximately 13% of its maximum (the spatial ‘‘range’’  $\lambda$ ):

$$\lambda = \frac{\sqrt{8\nu}}{\kappa}\tag{B.4}$$

and the marginal variance  $\sigma^2$  of the random field:

$$\sigma^2 = \frac{\Gamma(\nu)}{\Gamma(\nu + 0.5d)(4\pi)^{d/2} \kappa^{2\nu} \tau^2} \quad (\text{B.5})$$

where  $\Gamma$  is the gamma function,  $d$  is the dimension (i.e., 2 in the 2-dimensional spatial model),  $\nu=1$  as assumed in the Matérn approximation, and  $\kappa$  and  $\tau$  are the estimated parameters.

## LITERATURE CITED

- Cressie, N., and C. K. Wikle. 2011. *Statistics for spatio-temporal data*. John Wiley & Sons, Hoboken, New Jersey, USA.
- Kristensen, K., U. H. Thygesen, K. H. Andersen, and J. E. Beyer. 2013. Estimating spatio-temporal dynamics of size-structured populations. *Canadian Journal of Fisheries and Aquatic Sciences* 71:326–336.
- Lindgren, F., and H. Rue. 2013. Bayesian spatial and spatiotemporal modelling with r-inla. *Journal of Statistical Software*.
- Lindgren, F., H. Rue, and J. Lindström. 2011. An explicit link between Gaussian fields and Gaussian Markov random fields: the stochastic partial differential equation approach. *Journal of the Royal Statistical Society: Series B (Statistical Methodology)* 73:423–498.
- Rue, H., S. Martino, and N. Chopin. 2009. Approximate Bayesian inference for latent Gaussian models by using integrated nested Laplace approximations. *Journal of the royal statistical society: Series b (statistical methodology)* 71:319–392.
